# Supplementary material for: Effect of electron transfer on the photocatalytic hydrogen evolution efficiency of faceted TiO2/CdSe QDs under visible light
Source: Royal Society of Chemistry journal article supplement (doi:10.1039/c8nj00180d), 2018-01-01
Supplement: c8nj00180d1.pdf [file c8nj00180d1.pdf]

## New Journal of Chemistry

### Supplementary information

#### Effect of electron transfer on the photocatalytic hydrogen evolution efficiency of faceted TiO<sub>2</sub>/CdSe QDs under visible light

Weiwei Chen<sup>a</sup>, Shan Yu<sup>a\*</sup>, Yunqian Zhong<sup>a</sup>, Xiang-Bing Fan<sup>c</sup>, Li-Zhu Wu<sup>c</sup>, Ying Zhou<sup>a,b,\*</sup>

<sup>a</sup> The Center of New Energy Materials and Technology, School of Materials Science and Engineering, Southwest Petroleum University, Chengdu 610500, China.

<sup>b</sup> State Key Laboratory of Oil and Gas Reservoir and Exploitation, Southwest Petroleum University, Chengdu 610500, China.

<sup>c</sup> Key Laboratory of Photochemical Conversion and Optoelectronic Materials, Technical Institute of Physics and Chemistry, the Chinese Academy of Sciences, Beijing 100190, P. R. China

\* To whom correspondence should be addressed.

E-mail: [yzhou@swpu.edu.cn](mailto:yzhou@swpu.edu.cn); [yushan@mail.ipc.ac.cn](mailto:yushan@mail.ipc.ac.cn);

## Contents

1. Preparation of CdSe QDs, {001}-TiO<sub>2</sub> and {101}-TiO<sub>2</sub>
2. Absorption spectra of supernatant of CdSe QDs with or without TiO<sub>2</sub>
3. The photocatalytic hydrogen evolution activity of different TiO<sub>2</sub>/CdSe QDs
4. Stability test of of {001}-TiO<sub>2</sub>/CdSe QDs
5. References.

## **1. Preparation of CdSe QDs, {001}-TiO<sub>2</sub> and {101}-TiO<sub>2</sub>**

### **1.1 Synthesis of water soluble CdSe QDs**

Water soluble CdSe QDs was synthesized according to literature.<sup>1-3</sup> Firstly Na<sub>2</sub>SeSO<sub>3</sub> stock solution was prepared as the selenium source. Typically, 189 mg Na<sub>2</sub>SO<sub>3</sub> were dissolved in 100 mL deionized water, and then 40 mg selenium powder was added. After deoxygenated with Ar for 30 min, the system was refluxed for 3-4 h until all the selenium powder was dissolved.

46 mg of CdCl<sub>2</sub>·2.5H<sub>2</sub>O were dissolved in 190 mL deionized water, and 3-mercaptopropionic acid (26 µL) was added in a 500 mL round-bottom flask. Then the pH value of system was adjusted to 11 by NaOH aqueous solution (10 M). After deoxygenated with argon gas for 30 min, the freshly prepared Na<sub>2</sub>SeSO<sub>3</sub> aqueous solution (10 mL) was added into the system. Afterwards, the system was deoxygenated with Ar for 30 min again and then refluxed for 4 h at 130 °C. Finally, the light green-yellow aqueous solution of CdSe QDs was obtained.

### **1.2 Synthesis of TiO<sub>2</sub> Nanocrystals with Different Facets**

#### **1.2.1 Synthesis of Ti(OH)<sub>4</sub> precursor**

The synthesis of Ti(OH)<sub>4</sub> precursor was accomplished by sol-gel process.<sup>4</sup> 6.6 mL of TiCl<sub>4</sub> were dispersed into 20 mL aqueous HCl solution (0.43 M) in an ice bath to yield the clear solution. The solution was then slowly dropped to 5.5 wt% aqueous NH<sub>3</sub>·H<sub>2</sub>O in an ice bath with stirring, which yield the white suspension. 4 wt% aqueous NH<sub>3</sub>·H<sub>2</sub>O were dropped into it to adjust the pH value to 6.85. After aging at room temperature (25 °C) for 2 h, the precipitate was filtrated and washed with absolute ethanol and deionized water for at least 3 times, and AgNO<sub>3</sub> aqueous solution (0.05 M) was then used to detect the existence of chloride in the system. Eventually, the products were dried at 60 °C in air for 12 h.

#### **1.2.2 Synthesis of {101}-TiO<sub>2</sub>**

{101}-TiO<sub>2</sub> were prepared by hydrothermal method.<sup>4</sup> In detail, 2 g newly

prepared  $\text{Ti}(\text{OH})_4$  and 0.2 g  $\text{NH}_4\text{Cl}$  were dispersed in a mixed solution of isopropyl alcohol and water (30 mL, 1:1 v/v) and stirred for 30 min. Then the system was transferred into a 50 mL Teflon-lined stainless steel autoclave and heated for 24 h at  $180^\circ\text{C}$ . After that, the suspension were separated by filtration and then washed with ethanol and deionized water for at least 3 times. Finally, the samples were dried for 12 h at  $60^\circ\text{C}$ .

### 1.3 Synthesis of {001}- $\text{TiO}_2$

In a typical procedure according to the references,<sup>5-6</sup> 3.75 mL of  $\text{Ti}(\text{OC}_4\text{H}_9)_4$  was added into a dried Teflon-lined stainless steel autoclave with a capacity of 15 mL. Then 0.6 mL of HF solution was slowly dropped into the above liquid. The mixture was heated to  $200^\circ\text{C}$  and kept for 24 h in oven. After reaction, the white precipitate was separated by centrifugation. Then the products were washed thoroughly with absolute ethanol, 1 M NaOH aqueous solution and deionized water for at least 3 times to remove the residual fluoride. After dried at  $60^\circ\text{C}$  in air for 12 h and cooled down to room temperature, {001}- $\text{TiO}_2$  with clean surface were obtained.

## 2. Absorption spectra of supernatant of CdSe QDs with or without $\text{TiO}_2$

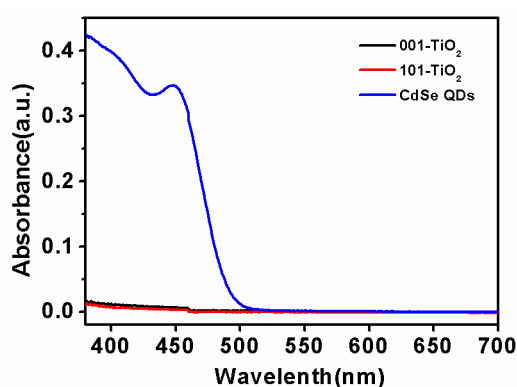

**Fig. S1** The absorption spectra of the aqueous solution of QDs before and after interaction with {001}- $\text{TiO}_2$  and {101}- $\text{TiO}_2$ .

### 3. The photocatalytic hydrogen evolution activity of different TiO<sub>2</sub>/CdSe QDs

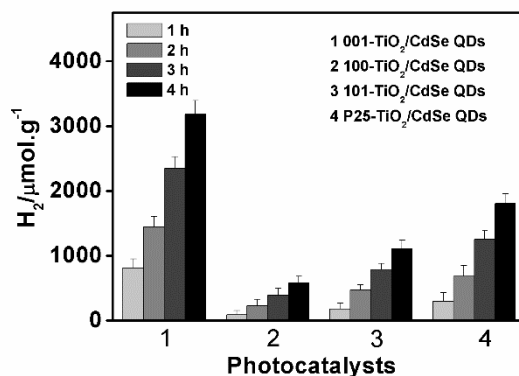

**Fig. S2** The evolution hydrogen amount of 5 mg of different CdSe QDs/TiO<sub>2</sub> composite containing with 0.4 mg Ni<sup>2+</sup> in 10 mL of isopropanol /H<sub>2</sub>O (1:1 v/v) under visible-light ( $\lambda \geq 420$  nm) 500 W high-pressure mercury lamp ( $I = 15.56$  mW cm<sup>-2</sup>) at pH = 11.

### 4. Stability test of of {001}-TiO<sub>2</sub>/CdSe QDs

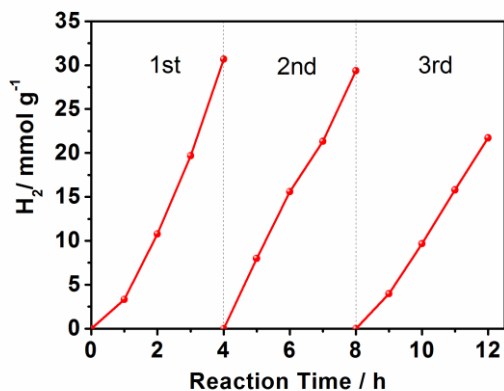

**Fig. S3** Stability test of {001}-TiO<sub>2</sub>/CdSe QDs for photocatalytic hydrogen evolution. Reaction conditions: 2 mg of {001}-TiO<sub>2</sub>/ CdSe QDs; sacrificial donor: isopropanol (1:1, v/v) in 7 mL of aqueous solution; cocatalyst: 0.2 mg Ni<sup>2+</sup> at pH 11;  $\lambda = 410$  nm,  $I = 150$  mW/cm<sup>2</sup>, LED light.)

## 5. References:

- 1 H. Y. Han, Z. H. Sheng and J. G. Liang, *Mater. Lett.*, 2006, **60**, 3782-3785.
- 2 S. Yu, Z. J. Li, X. B. Fan, J. X. Li, F. Zhan, X. B. Li, Y. Tao, C. H. Tung and L. Z. Wu, *ChemSusChem*, 2015, **8**, 642-649.
- 3 Z. J. Li, J. J. Wang, X. B. Li, X. B. Fan, Q. Y. Meng, K. Feng, B. Chen, C. H. Tung and L. Z. Wu, *Adv. Mater.*, 2013, **25**, 6613-6618.
- 4 J. M. Peng, Y. Zhou, H. Wang, H. Zhou and S. Y. Cai, *CrystEngComm*, 2015, **17**, 1805-1812.
- 5 L. C. Liu, X. R. Gu, Y. Cao, X. J. Yao, L. Zhang, C. J. Tang, F. Gao and L. Dong, *ACS Catal.*, 2013, **3**, 2768-2775.
- 6 X. H. Yang, Z. Li, G. Liu, J. Xing, C. H. Sun, H. G. Yang and C. Z. Li, *CrystEngComm*, 2011, **13**, 1378-1383.
